# Supplementary material
Source: publisher figshare collection journal article supplement (https://diabetesjournals.figshare.com/ndownloader/files/27491573)
Supplement: Supplementary file 1 [file 27491573]

| **T1D Exchange QI Collaborative Writing Group** | |  | | --- | |
| --- | --- | --- |
|  |  |
|  |  |
| **Clinic Name** | **PI Names** |
| 1. Barbara Davis Center for Childhood Diabetes, Children’s Hospital | G. Todd Alonso |
| 2. Barbara Davis Center for Diabetes, Adult | Sarit Polsky |
| 3. Baylor College of Medicine, Texas Children’s Hospital | Daniel DeSalvo |
| 4. Children’s Hospital of Los Angeles | Brian Miyazaki |
| 5. Children’s Mercy Hospital | Mark Clements |
| 6. Cincinnati Children’s Hospital Medical Center | Sarah Corathers |
| 7. Cook Children’s Medical Center | Susan Hsieh |
| 8. Emory University, Children's Healthcare of Atlanta | Kristina Cossen |
| 9. Indiana University Health Pediatric | Anna Neyman |
| 10. Le Bonheur Children's Hospital, University of Tennessee | Ahlee Kim & Grace Nelson |
| 11. Lurie Children's Hospital | Naomi Fogel |
| 12. Nationwide Children's Hospital | Manmohan Kamboj |
| 13. Northwell Health, Cohen Children’s Medical Center | Jennifer Sarhis & Allison Mekhoubad |
| 14. NYU Langone Adult | Lauren Golden |
| 15. NYU Langone Health Pediatric | Mary Pat Gallagher |
| 16. Penn Rodebaugh Diabetes Center, Penn Medicine Adult | Ilona Lorincz |
| 17. Rady Children’s Hospital | Carla Demeterco-Berggren |
| 18. Seattle Children’s Hospital | Faisal Malik & Alissa Roberts |
| 19. Spectrum Health, Helen DeVos Children’s Hospital | Donna Eng |
| 20. Stanford Adult Diabetes | Marina Basina |
| 21. Stanford Pediatrics, Lucille Packard Children's Hospital | Priya Prahalad |
| 22. SUNY Upstate Medical University, Joslin Diabetes Adult | Ruth Weinstock |
| 23. SUNY Upstate Medical University, Joslin Diabetes Pediatric | Roberto Izquierdo |
| 24. Univ. of Alabama at Birmingham Pediatric | Mary Lauren Scott & Jessica Schmitt |
| 25. Univ. of Florida Diabetes Institute Pediatric | Laura Jacobson |
| 26. Univ. of Miami, Miller School of Medicine Adult | Francesco Vendrame |
| 27. Univ. of Miami, Miller School of Medicine Pediatric | Janine Sanchez |
| 28. Univ. of Mich. Hospitals-Mich. Med, C.S. Mott Children’s Hospital | Joyce Lee |
| 29. Wayne State University Adult | Elizabeth Morrison |
| 30. Weill Cornell Medicine Pediatric | Alexis Feuer |
| 31. T1D Exchange QI Collaborative Coordinating Center | Osagie Ebekozien |
